# Supplementary material
Source: Springer Nature journal article supplement (https://www.springermedizin.de/resource/supplementary/12959_2006_53_MOESM5_ESM.pdf/9569440)

**A**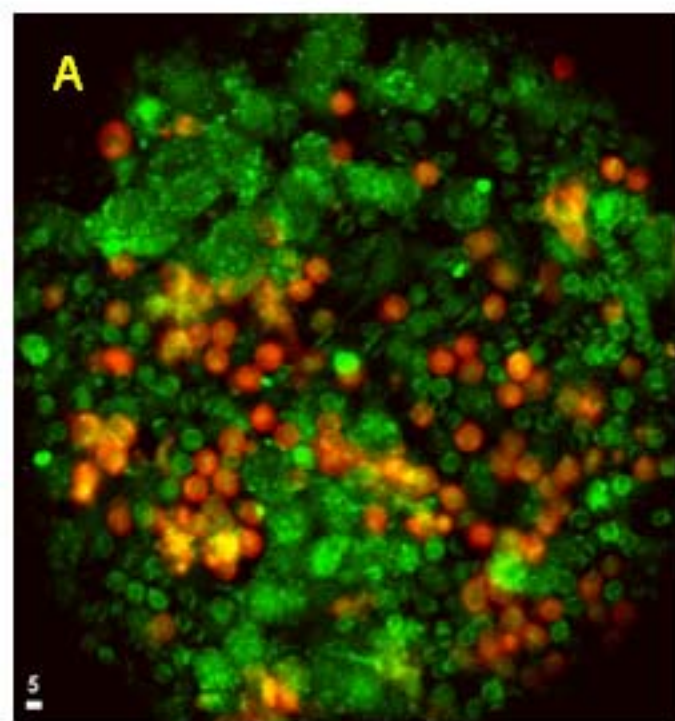**B**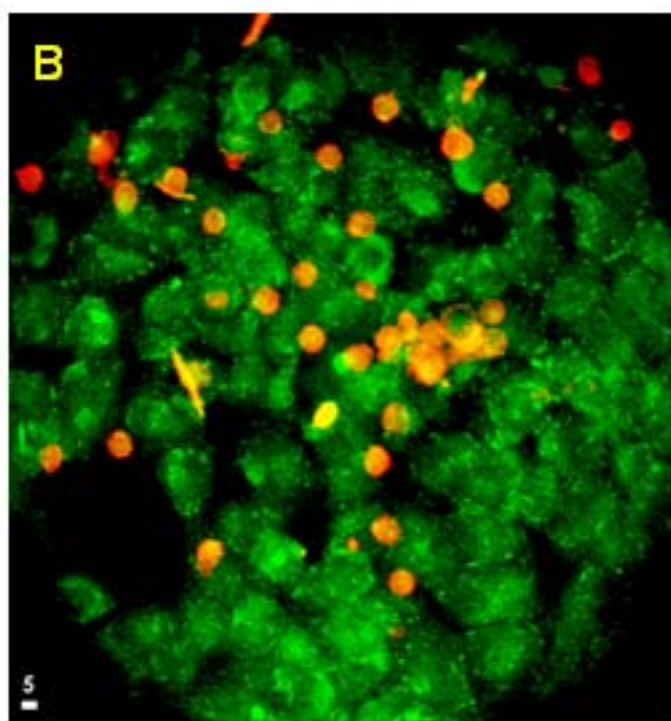

Supplement: MOESM5 [file 9569440]
